# Supplementary material
Source: HighWire-hosted journal article supplement (https://bmjopensem.bmj.com/content/4/1/e000370)
Supplement: inline-supplementary-material-1 [file inline-supplementary-material-1.docx]

**Table S1 – Criteria for Exercise Stress Test**

| 1. **Personal History**  - Cardiac-related syncope and/or pre-syncope during and after exertion for no apparent reason - Angina during exertion - Dyspnea during exertion - Unusual fatigue during exercise - Palpitations during exercise - History of Rheumatic Fever  1. **Family History**  - Family history (first or second degree relative) of SCD or any unexpected or unexplained sudden death (i.e. drowning, car accident, or sudden infant death syndrome) < 50 yr - *Family history (first or second degree relative) of inheritable heart conditions (hypertrophic cardiomyopathy, arrhythmogenic right ventricular cardiomyopathy, Marfan’s syndrome, long QT syndrome, short QT syndrome, Brugada syndrome, Wolf-Parkinson-White Syndrome, catecholaminergic polymorphic ventricular tachycardia, dilated cardiomyopathy, thoracic aorta aneurysm, bicuspid aortic valve, or other potentially disabling CV disease) - Family history of premature CAD (first degree relative) < 50 years   *A family history of autosomal dominant disorders requires follow-up in first and second degree relatives.   1. **Physical Examination**  - >180/110 mmHg on more than one reading - Mid or end-systolic clicks - Abnormal second heart sound (single or widely split and fixed with respiration) - Any diastolic murmur - Systolic murmur grade ≥ 2 - Abnormal femoral pulses indicative of aortic coarctation - Morphological features of Marfan’s syndrome - Irregular heart rate  1. **Cardiovascular Risk**  - Intermediate (10-19%) to high (≥ 20%) Framingham Risk Score - Diabetes (≥ 7.0 mmol/L or post-prandial ≥ 11.1 mmol/L) - > 8 mmol/L blood cholesterol  1. **Age ≥ 65 years** 2. **Abnormal resting 12-lead ECG (‘Seattle Criteria’)** 3. **Previously known atrial fibrillation** 4. **Other previous potentially concerning conditions** (i.e. pulmonary embolism, query myocarditis, epicardial cyst) |
| --- |
